# Supplementary material for: Highly selective esterification of bioderived itaconic acid to monobutyl itaconate: kinetic analysis of a reusable 20% (w/w) Rb0.5Cs2.0H0.5PW12O40/MCF catalyst system
Source: Royal Society of Chemistry journal article supplement (doi:10.1039/d3nj02564k), 2023-01-01
Supplement: d3nj02564k1.pdf [file d3nj02564k1.pdf]

**Electronic Supplementary Information**

**Highly selective esterification of bioderived itaconic acid to  
monobutyl itaconate: Kinetic analysis of a reusable 20% (w/w)**

**$\text{Rb}_{0.5}\text{Cs}_{2.0}\text{H}_{0.5}\text{PW}_{12}\text{O}_{40}$  /MCF catalyst system**

**Rohitkumar G. Singh; Ganapati D. Yadav\***

Department of Chemical Engineering, Institute of Chemical Technology,  
Nathalal Parekh Marg, Matunga, Mumbai-400019, India.

\* Corresponding author (Tel.: +91-22-3361-2010/1111/2222; Fax: +91-22-3361-1020;

Email: [gdyadav@yahoo.com](mailto:gdyadav@yahoo.com); [gd.yadav@ictmumbai.edu.in](mailto:gd.yadav@ictmumbai.edu.in)

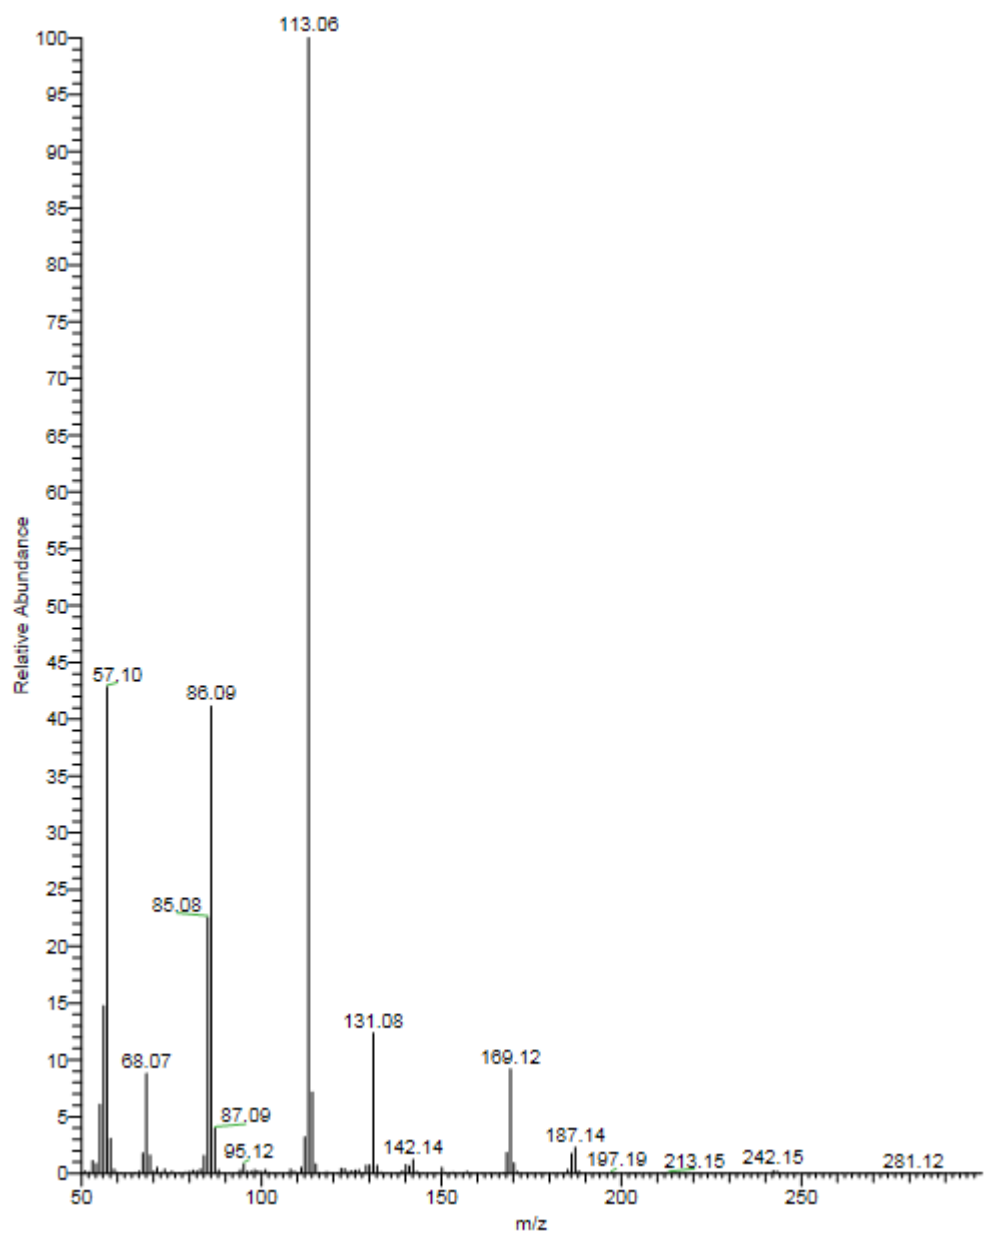

Figure S1. GC-MS for product (mono-butyl itaconate) formation confirmation

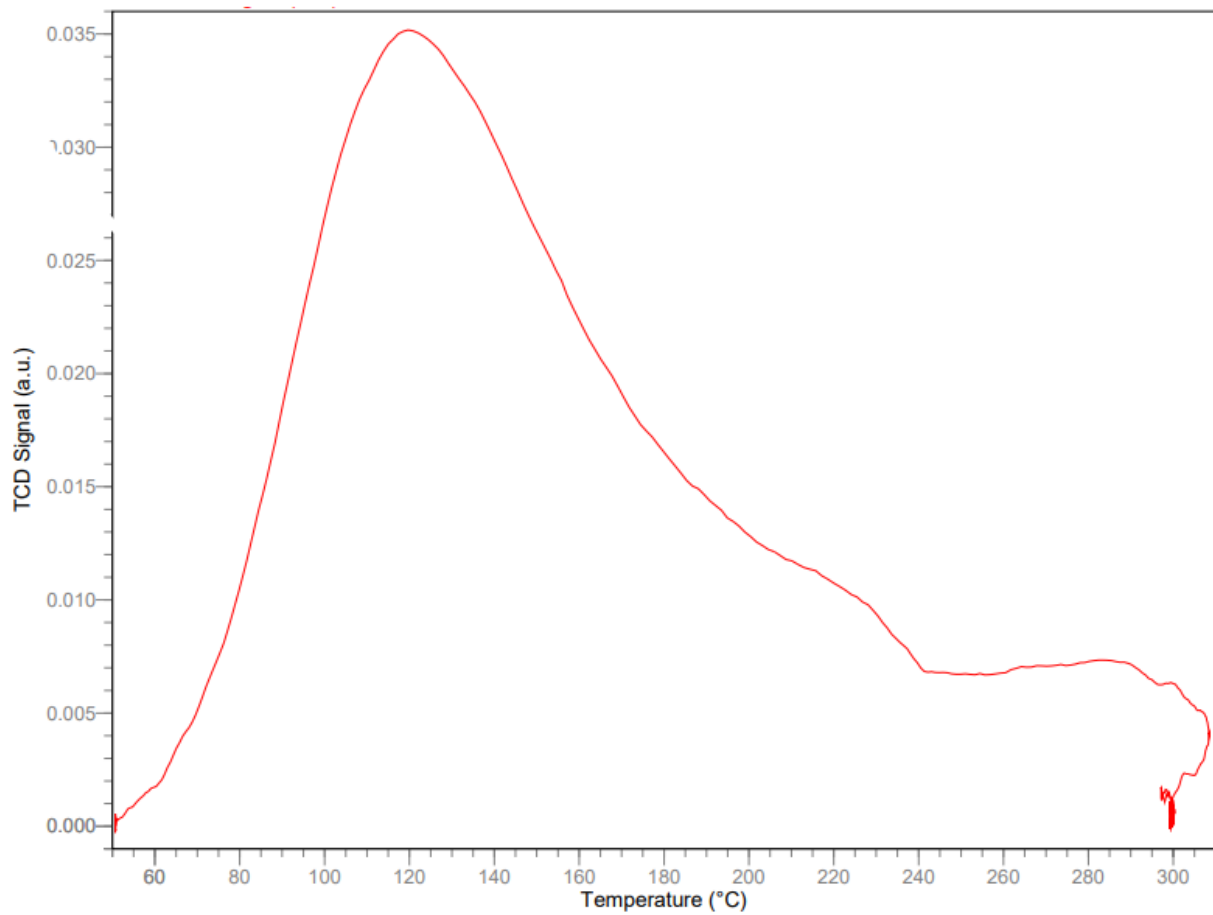

Figure S2. Ammonia-TPD profile of Cs-DTP/Bulk

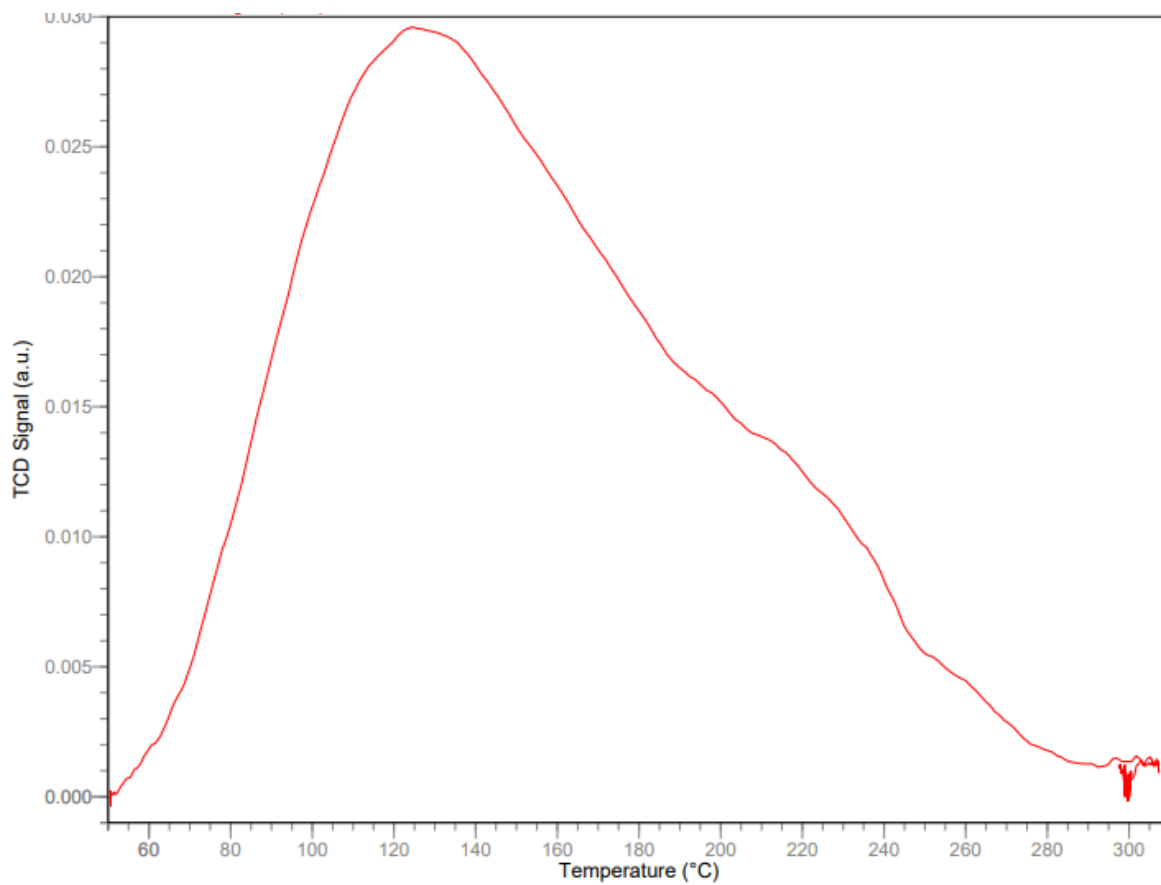

Figure S3. Ammonia-TPD profile of Cs-Rb-DTP/Bulk

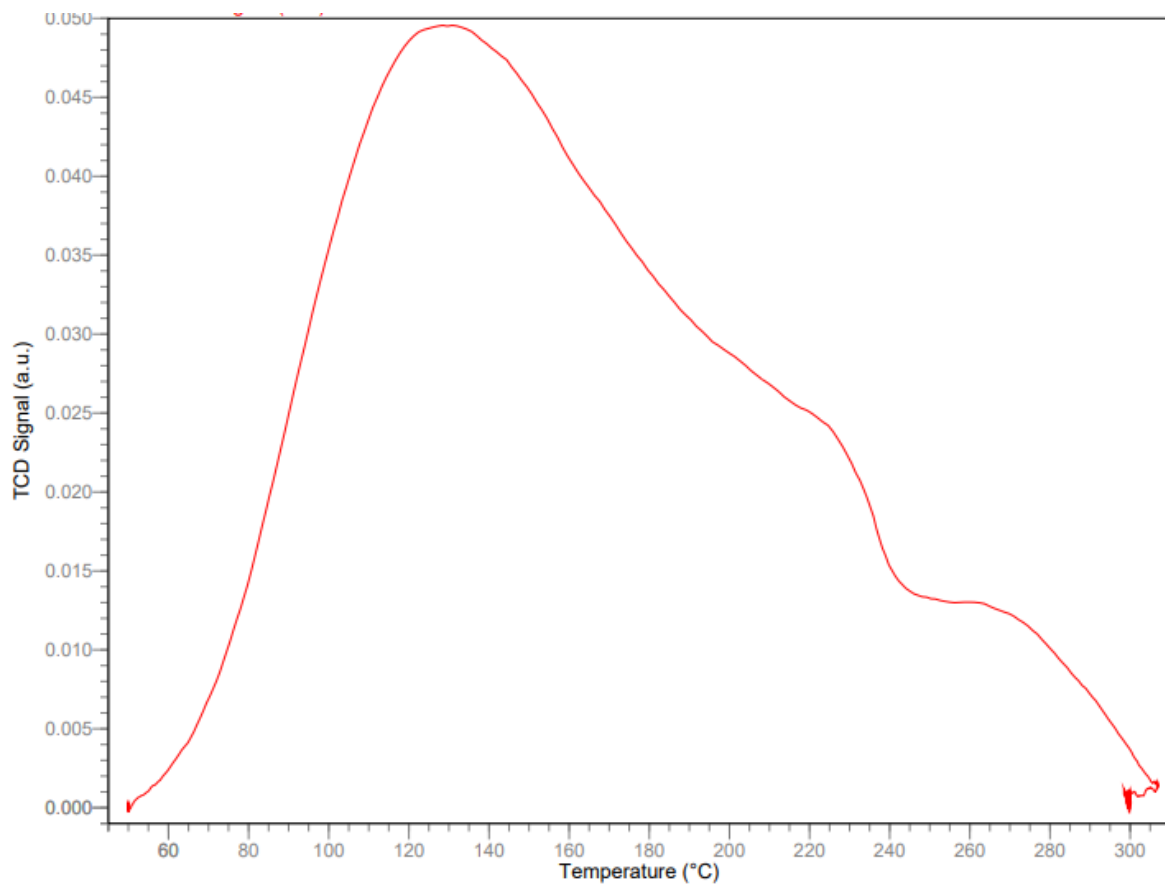

Figure S4. Ammonia-TPD profile of Rb-Cs-DTP/Bulk

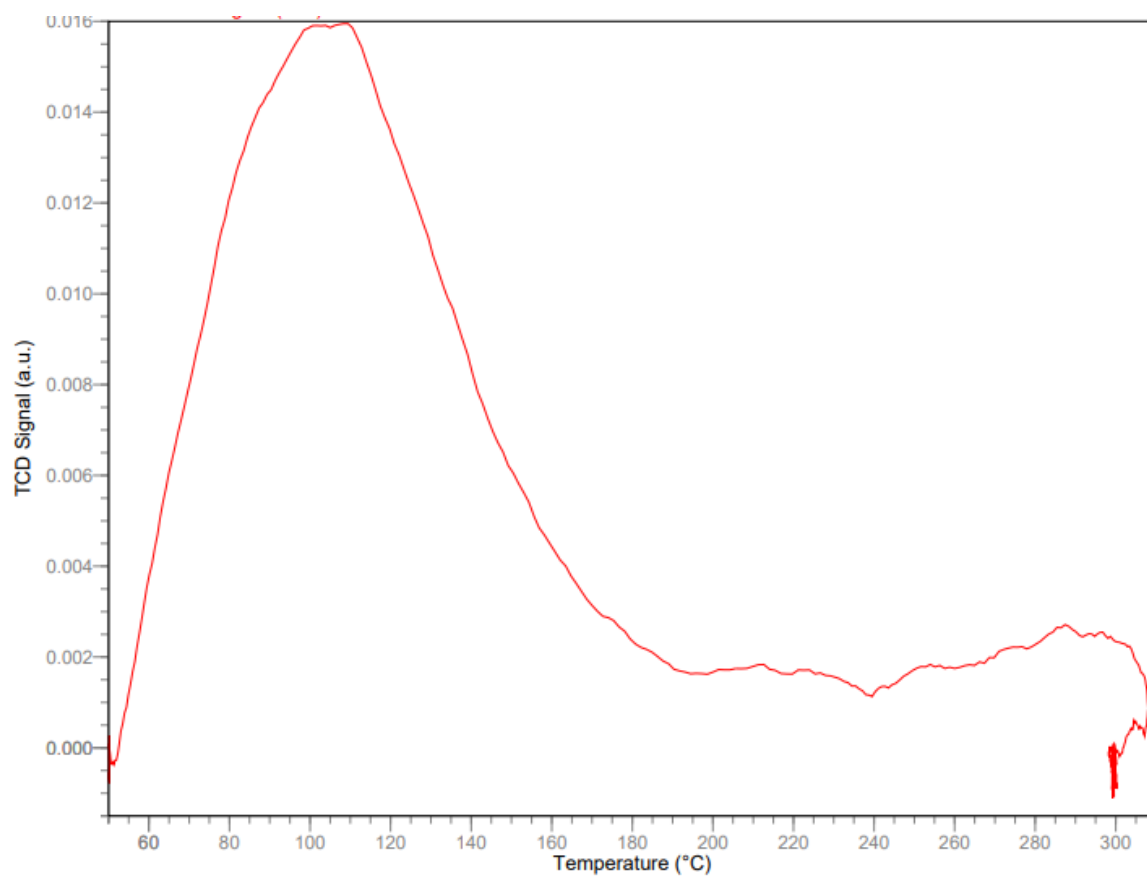

Figure S5. Ammonia-TPD profile of 20% (w/w) Rb-Cs-DTP/MCF (Fresh)

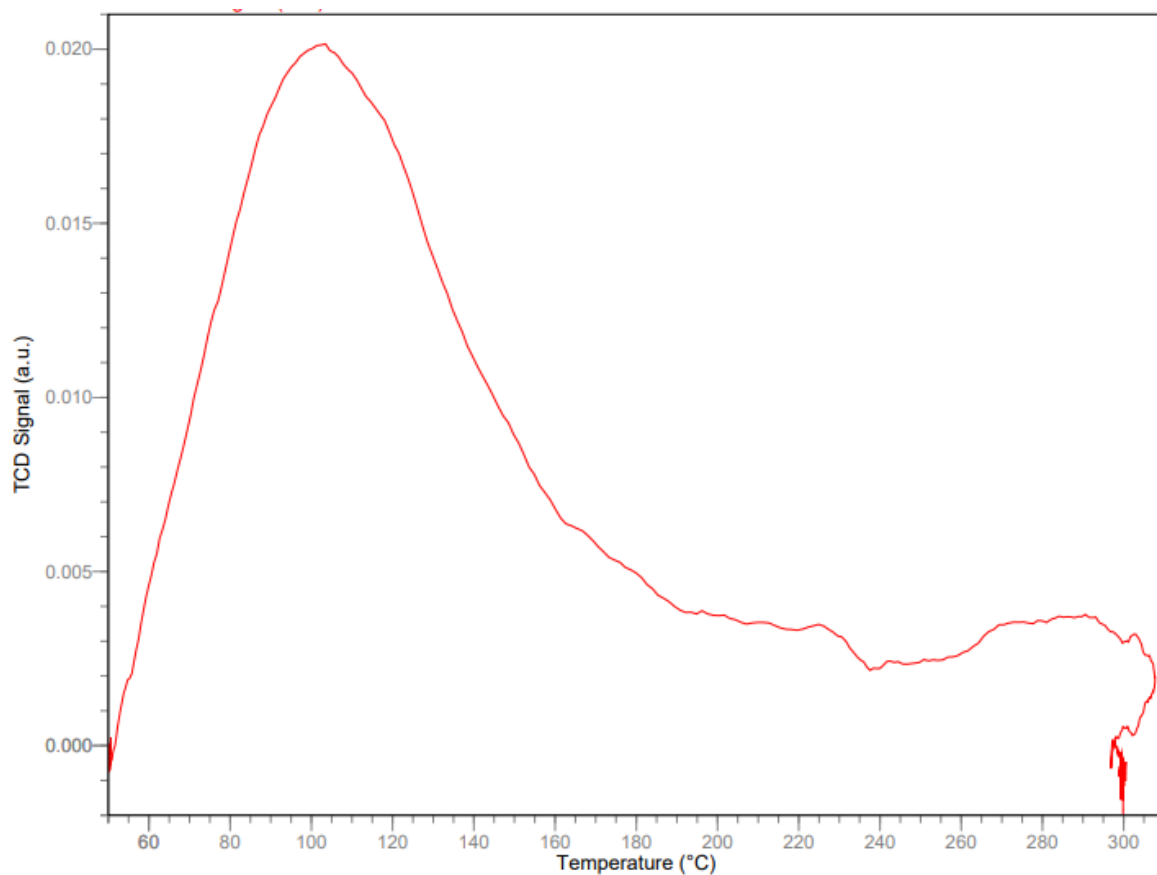

Figure S6. Ammonia-TPD profile of 20% (w/w) Rb-Cs-DTP/MCF (Spent)

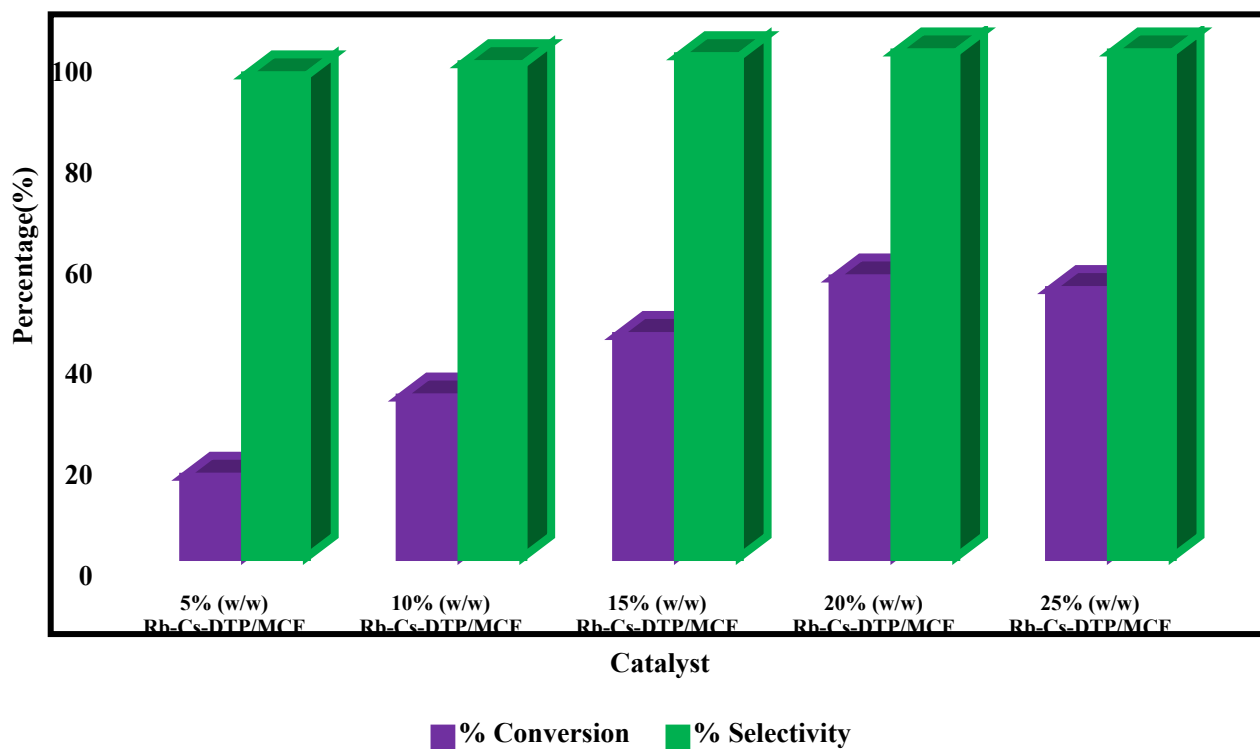

Figure S7. Effectiveness of different supported catalysts with varied loading for selective esterification of itaconic acid. Reaction conditions – Itaconic acid (0.00546 mol), n-butyl

alcohol (0.1092 mol); catalyst amount - (0.05 g/mL); total reaction volume-10.1mL;  
temperature-118 °C; speed of agitation-1000 rpm, time-120 min
